# Supplementary material for: Identifying Single Copy Orthologs in Metazoa
Source: PLOS journal article supplement (doi:10.1371/journal.pcbi.1002269), 2011-12-01

- Genome with less than 3x coverage
- Genome with between 3x and 7x coverage
- Genome with greater than 7x coverage

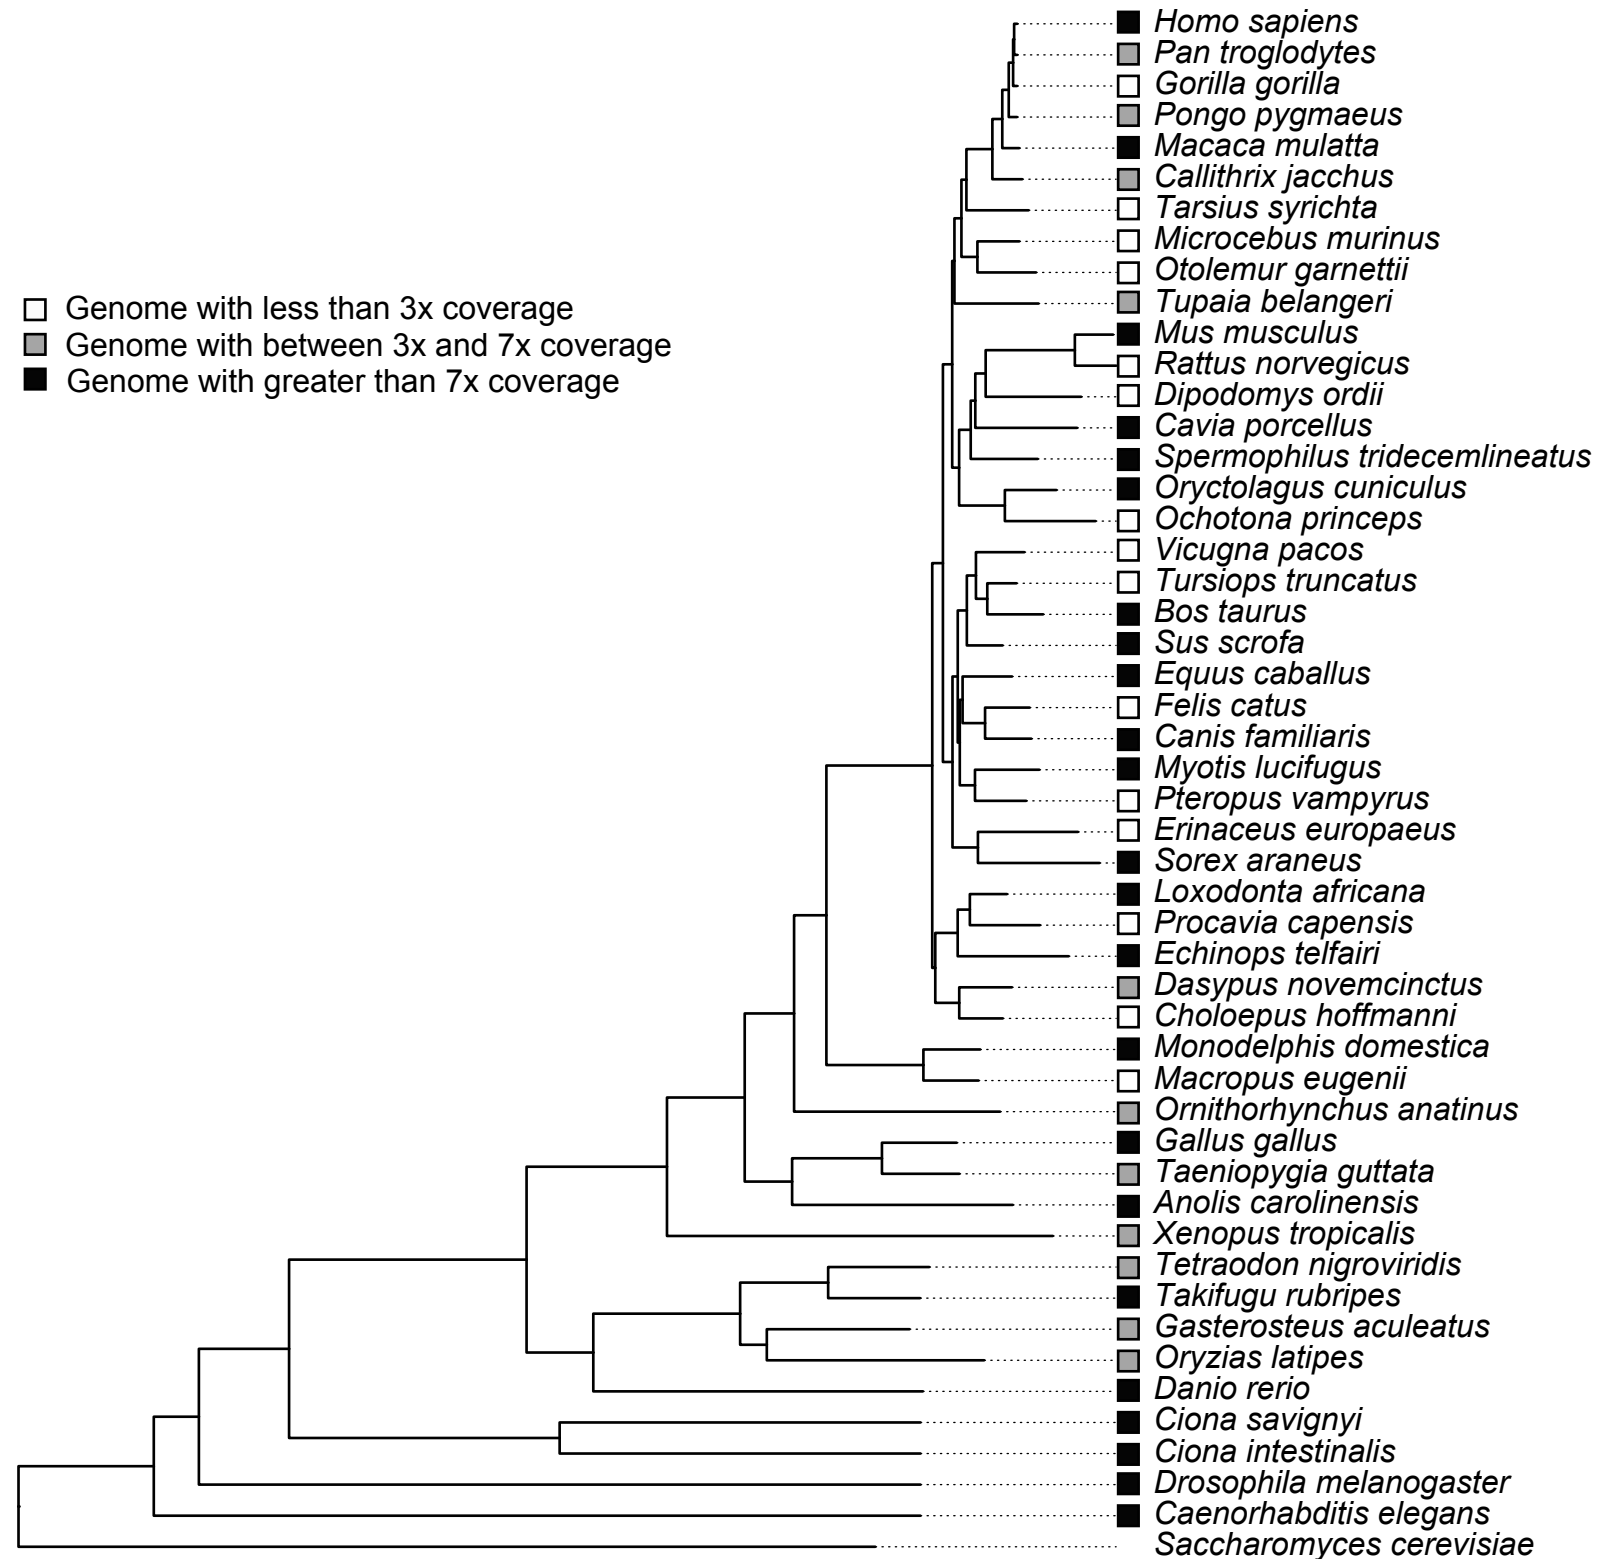

Supplement: S5 (10.1371/journal.pcbi.1002269.s005) [file journal.pcbi.1002269.s005]
